# Supplementary material for: Computed tomography synthesis from magnetic resonance imaging using cycle Generative Adversarial Networks with multicenter learning
Source: PubMed Central journal article supplement — Phys Imaging Radiat Oncol. 2023 Nov 17;28:100511. doi: 10.1016/j.phro.2023.100511 (PMC10709085; doi:10.1016/j.phro.2023.100511), 2023-11-17
Supplement: mmc1.pdf [file mmc1.pdf]

## Supplementary material

### Supplementary material A

| Number of center in the training | Test Center       | C1                  | C2                 | C3                  | C4                  |
|----------------------------------|-------------------|---------------------|--------------------|---------------------|---------------------|
|                                  | Training          | ME                  |                    |                     |                     |
| 1                                | C1                | <b>0.32 ± 13.73</b> | 51.2 ± 18.4        | 11.5 ± 19.4         | 17.85 ± 17.02       |
|                                  | C2                | -28.29 ± 13.8       | <b>4.8 ± 16.5</b>  | -29.1 ± 15.9        | -17.6 ± 8.8         |
|                                  | C3                | 27.5 ± 27.1         | 83.6 ± 46.1        | <b>1.0 ± 20.3</b>   | 60.0 ± 40.1         |
|                                  | C4                | 2.7 ± 15.4          | 45.9 ± 15.6        | 9.1 ± 18.5          | <b>18.65 ± 14.1</b> |
| 2                                | C1 & C2           | <b>-1.87 ± 15.4</b> | <b>0.43 ± 14.7</b> | -17.0 ± 15.6        | 3.20 ± 10.4         |
|                                  | C1 & C3           | <b>0.54 ± 14.4</b>  | 61.9 ± 27.5        | <b>-3.2 ± 15.3</b>  | 20.9 ± 17.3         |
|                                  | C1 & C4           | <b>-0.52 ± 14.1</b> | 39.6 ± 14.6        | -0.5 ± 15.1         | <b>14.4 ± 13.3</b>  |
|                                  | C2 & C3           | 10.7 ± 19.1         | <b>8.9 ± 32.2</b>  | <b>-6 ± 18.5</b>    | 22.1 ± 18.5         |
|                                  | C2 & C4           | -6.0 ± 15.5         | <b>16.8 ± 21.3</b> | 16.8 ± 21.3         | <b>16.1 ± 11.5</b>  |
|                                  | C3 & C4           | -0.5 ± 16.7         | 57.6 ± 20.9        | <b>-5.1 ± 16.6</b>  | <b>20.6 ± 18.4</b>  |
| 3                                | C1 & C2 & C3      | <b>-0.75 ± 16.0</b> | <b>6.2 ± 25.7</b>  | <b>-12.1 ± 22.3</b> | 26.5 ± 1.3          |
|                                  | C1 & C2 & C4      | <b>-0.95 ± 15.9</b> | <b>4.0 ± 19.5</b>  | -2.5 ± 14.6         | <b>14.9 ± 11.7</b>  |
|                                  | C1 & C3 & C4      | <b>-1.7 ± 15.8</b>  | 30.6 ± 24.6        | <b>-5.9 ± 14.7</b>  | <b>15.9 ± 20.1</b>  |
|                                  | C2 & C3 & C4      | -8.8 ± 19.9         | <b>5.3 ± 34.5</b>  | <b>3.6 ± 20.0</b>   | <b>9.9 ± 21.8</b>   |
| 4                                | C1 & C2 & C3 & C4 | <b>-4.6 ± 13.8</b>  | <b>4.6 ± 23.7</b>  | <b>-13.4 ± 19.9</b> | <b>12.9 ± 17.7</b>  |

Table 3. Table 2: ME results (in HU) comparing the reference CT with the synthetic-CTs in the whole pelvis for the different trainings. Rows represent the centers used for training and the columns represent the centers used for test. The values are the MEs between CT and sCT for all test patients associated to the standard deviation. Results in bold represent cases 1 (monocenter case) and 3 (multicenter with seen data case).

### Supplementary material B

| Number of center in the training | Training          | PSNR              |                   |                   |                   |
|----------------------------------|-------------------|-------------------|-------------------|-------------------|-------------------|
|                                  | Test Center       | C1                | C2                | C3                | C4                |
| 1                                | C1                | <b>31.7 ± 1.1</b> | 24.9 ± 1.2        | 26.9 ± 3.8        | 25.9 ± 1.2        |
|                                  | C2                | 26.4 ± 0.6        | <b>25.9 ± 1.2</b> | 26.7 ± 3.1        | 25.2 ± 0.6        |
|                                  | C3                | 26.9 ± 1.1        | 23.6 ± 1.8        | <b>29.1 ± 2.2</b> | 24.0 ± 2.0        |
|                                  | C4                | 28.0 ± 1.0        | 24.6 ± 1.2        | 27.3 ± 3.5        | <b>26.8 ± 1.6</b> |
| 2                                | C1 & C2           | <b>31.2 ± 1.1</b> | <b>26.2 ± 1.4</b> | 27.6 ± 3.5        | 26.4 ± 1.3        |
|                                  | C1 & C3           | <b>31.5 ± 0.9</b> | 24.5 ± 1.5        | <b>29.1 ± 3.2</b> | 25.8 ± 1.1        |
|                                  | C1 & C4           | <b>31.6 ± 1.0</b> | 25.2 ± 1.1        | 27.3 ± 3.6        | <b>27.1 ± 1.3</b> |
|                                  | C2 & C3           | 27.9 ± 1.1        | <b>25.6 ± 1.3</b> | <b>29.2 ± 3.2</b> | 25.6 ± 0.9        |
|                                  | C2 & C4           | 28.6 ± 0.8        | <b>25.7 ± 1.4</b> | -18.2 ± 18        | <b>27.1 ± 1.1</b> |
|                                  | C3 & C4           | 28.5 ± 1.1        | 24.7 ± 1.6        | <b>29.2 ± 3.1</b> | <b>26.9 ± 1.6</b> |
| 3                                | C1 & C2 & C3      | <b>31.1 ± 1.1</b> | <b>25.8 ± 1.4</b> | <b>30.8 ± 2.7</b> | 26.5 ± 1.3        |
|                                  | C1 & C2 & C4      | <b>31.1 ± 1.0</b> | <b>26.3 ± 1.2</b> | 28.3 ± 3.2        | <b>26.6 ± 1.4</b> |
|                                  | C1 & C3 & C4      | <b>31.3 ± 0.9</b> | 25.4 ± 1.3        | <b>29.1 ± 2.8</b> | <b>26.6 ± 1.3</b> |
|                                  | C2 & C3 & C4      | 28.9 ± 1.0        | <b>25.7 ± 1.6</b> | <b>30.0 ± 3.0</b> | <b>26.4 ± 0.9</b> |
| 4                                | C1 & C2 & C3 & C4 | <b>31.1 ± 0.9</b> | <b>25.8 ± 1.6</b> | <b>30.3 ± 2.9</b> | <b>26.5 ± 1.4</b> |

Table 4. Table 2: PSNR results (in dB) comparing the reference CT with the synthetic-CTs in the whole pelvis for the different trainings. Rows represent the centers used for training and the columns represent the centers used for test. The values are the PSNR between CT and sCT for all test patients associated to the standard deviation. Results in bold represent cases 1 (monocenter case) and 3 (multicenter with seen data case).
